# Supplementary material for: Di- and oligo-nuclear nickel complexes with oxalic amidinato bridging ligands: syntheses, structures and catalytic reactions
Source: Royal Society of Chemistry journal article supplement (doi:10.1039/b000791i), 2000-01-01
Supplement: b000791i.doc [file b000791i.doc]

**Supplementary** **data**

Di- and oligonuclear nickel complexes with oxalic amidinato bridging ligands: syntheses, structures and catalytic reactions

Thomas Döhler, Helmar Görls und Dirk Walther*

*Institut für Anorganische und Analytische Chemie der Friedrich-Schiller-Universität D-07743 Jena (Germany) E.-mail: Walther cdw@ rz.uni-jena.de*

**General Procedures.** All reactions and analytical investigations were conducted under an atmosphere of dry argon using standard Schlenk techniques. Prior to use, tetrahydofuran and toluene over potassium hydroxide and distilled from sodium benzophenone ketyl.

1H, and 13C NMR spectra were recorded on a Bruker AC 200 F spectrometers. Elemental analyses were performed with Leco CHNS-932.

The metal content of the complexes was determinated by complexometric titration after oxidation of the organic material by hot concentrated perchloric acid (CAUTION! Solutions of perchlorates and mixtures of organic material and concentrated perchloric acid are explosive!). The Zn/Ni content was determinated as follows. The neutral solution containing the metals was treated with NH4Cl/NH3 followed by an excess of 0.01 m EDTA solution. After complexation of both metals free EDTA was determinated by titration with 0.01 m MgCl2 solution (indicator: Erio T). This allowed to determine the sum of the metals. Treatment of this solution with 2 mL of an ethanolic solution (10%) of dimercaptopropanol resulted in the formation of the Zn complex with dimercaptopropanol and equivalent quantities of free EDTA. The latter was determinated by titration with 0.01 m MgCl2 ( = Zn content).

Complex 1: Tetraphenyl-oxalic amidine (0.74 mmol, 0.29 g) and Ni(acac)2 (1.58 mmol, 0.38 g) were dissolved in 18 ml toluene and heated to reflux for three hours an filtrated at 100 °C. At room temperature red-brown crystals were isolated. Recrystallisation from hot toluene gave the red-brown crystalline complex 1. Yield: 60%. Both the crystalline bulk material and the single crystals crystals showed 1H NMR- and mass spectra.

C36H34N4 Ni2O4; anal. calcd.: C: 61.41, H: 4.87, N: 7.96, Ni: 16.67%; found: C: 62.83, H: 4.49%, N: 7.1%, Ni: 15.84 %.- *MS*: 702 (18%, M+, C36H34N4O4Ni2), 603 (15%, M+-C5H7O2), 545 (12%, M+-C5H7O2Ni), 446 (8%, M+-C10H14O2Ni), 388 (2%, M+-C10H14O4Ni2), 195 (17%, M+-C23H23N2O4Ni2). - *1H-NMR* (D8-THF, 25°C): : 1.21 (CH3-acac, 12H), 4.02 (CH-acac, s, 2H), 5.85, 6.09 (CH aryl, m, 12 H), 7.08 (CH aryl, 8 H).

**Complex 2**: Tetra-p-tolyl-oxalic amidine (3.29 mmol, 1.47 g) and Ni(acac)2 (6.57 mmol, 1.69 g) were dissolved in 20 ml toluene and heated to reflux for six hours. After evaporation of the solvent the reaction product was washed with hexane to remove acetylacetone and than recrystallised from toluene to yield a red –brown crystalline compound. Yield: 55%.

C40H42N4 Ni2O4: anal. calcd.: C: 63.2, H: 5.57, N: 7.37, Ni: 15.45%; found: C: 63.14, H: 5.83, N: 7.31, 15.39%. *-* *MS*: 758 (29%, M+, C40H42N4 Ni2O4), 658 (4%, M+ - C5H8O2), 601 (2%, M+ - C5H7O2Ni2).- 1H-NMR (D8-THF, 25°C): : 1.11 (CH3-acac, s, 12H), 2.37 (p-CH3, s, 12H), 4.19 (CH-acac, s, 2H), 6.20 (CH aryl, m, 8 H), 6.62 (CH aryl, m, 8H).

**Complex 3**:Tetramesityl-oxalic amidine (6.2 mmol, 3.45 g) and Ni(acac)2 (12.3 mmol, 3.17 g) were suspended in THF (70 ml) and heated to reflux for one hour. The precipitate was filtred at room temperature and washed with 15 ml n- pentane. The crude product was recrystallised from THF yielding a red microcrystalline substance in 40% yield. C48H58N4Ni2O4:anal. calcd.: C: 66.09, H: 6.7, N: 6.42, Ni: 13.45%; found.: C: 65.98%, H: 6.60, N: 6.43, Ni: 13.66%. - *MS* (EI): 870 (2%, M+, C48H58N4O4Ni2), 770 (1%, M+-C5H8O2), 699 (1%), 614 (0.5%, M+-C5H6O2Ni), 543 (2%), 492 (4%), 479 (5%, M+-C20H29O4Ni), 436 (57%, M+-C19H26O4Ni2/M+-C24H28N2O2Ni), 385 (50%), 335 (78%), 277 (100%, M+-C29H37N2O4Ni2), 262 (19%, M+-C30H40N2O4Ni2), 216 (42%, M+-C31H46N4O4Ni2), 157 (26%, M+-C43H51N4O2Ni), 134 (51%), 91 (44%, M+-C41H51N4O4Ni2), 40 (35%). - 1H-NMR (D8-THF, 25°C): : 1.05, 1.93 (CH3-acac, 2x s, 12H), 2.23, 2.26 (p-CH3, 2x s, 12H), 2.47, 2.52 (o-CH3, 2x s, 24H), 4.98 (CH-acac, s, 2H), 6.25, 7.04 (CH-mes, s/m, 8H).

Complex 4: A mixture of the oxalic amidine (0.99 mmol, 0.5 g) and Ni(acac)2 (1.99 mmol, 0.51 g) in 15 mL THF was stirred overnight. After evaporation of the solvent the reaction product was dissolved in toluene. At 5 °C brown crystals were isolated in about 40% yield.

Single crystals suitable for an X- ray analysis were obtained after slow cooling.

C44H50N4Ni2O4: anal. calcd.: C: 64.74, H: 6.17, N: 6.86, Ni: 12.54%; found: C: 65.53, H: 6.36, N: 6.99, Ni: 12,45%. - *MS* (EI): 816 (42%, M+2+, C44H52N4O4Ni2), 657 (5%, M+-C5H7O2Ni), 558 (4%, M+-C10H14O4Ni), 407 (6%), 357 (9%), 307 (28%), 249 (100%, M+-C27H33N2O4Ni2), 216 (21%), 159 (32%, M+-C34H39N2O4Ni2), 141 (30%), 100 (12%, M+-C39H42N4O2Ni2), 43 (28%). - IR:  (cm-1): 3050 (CH-Aryl,), 1616 (C=N), 1595 (C=C-acac), 1575, 1559 (CO-acac), 1290 (CO), 1104, 1019 (oop-CH-Aryl)

**Complex 5**: A solution of diethylzink (1.1 M in toluene, 1.82 mL) was treated with 10 ml toluene. The stirred solution was very slowly treated with a solution of acetylacetone ( 0.21 mL in 10 mL toluene). Then the reaction mixture was heated to reflux for two minutes. After the development of ethane was complete the hot solution was added to a hot solution of tetramesity-loxalic amidine (2 mmol, 1.12 g in 20 ml toluene, heated at reflux). Then a solution of Ni(acac)2 (2 mmol, 0.51 g in 10 mL toluene) was added. A microcrystalline red product was isolated at room temperature containing traces of the Zn2 complex and small quantitiws of the Ni2 complex. Repeated recrystallisation from toluene gave the red microcrystalline complex **5** in 30% yield - C48H58N4NiO4Zn: anal. calcd.: C: 65.58, H: 6.65, N: 6.37%, Ni: 6.68%; Zn: 7.44% found: C: 65.22, H: 6.45, N: 6.24%, Ni: 6.46%, Zn: 6.94%. - *MS*: (EI) 876 (41%, M+, C48H58N4O4NiZn), 776 (4%, M+-C5H8O2), 713 (2%, M+-C5H7O2Zn), 614 (1%, M+-C10H14O4Zn), 335 (12%, M+-C29H37N2O4Zn), 277 (100%, M+-C29H37N2O4NiZn). - *1H-NMR* (D8-toluene, 25°C): : 0.89, 0.96 (CH3-acac, 2x s, 6H), 1.4, 1.43 (CH3-acac, 2x s, 6H), 1.95 (o-CH3, m, 12H), 2.39, 2.42 (p-CH3, 2x s, 12H), 2.69, 2.72 (o-CH3, 2x s, 12H), 4.57, 4.69 (CH-acac, 2x s, 2H), 6.33, 6.35 (CH-mes, 2x s, 8H).

PENDANT-13C NMR (D8-toluene, 25°C, ppm):  19.25 (p-CH3), 20.39, 20.58 (o-CH3), 24.16, 24.31, 27.65 (CH3-acac), 100.18, 100.8 (CH-acac), 128.4, 128.85 (CH-mes), 131.48, 132.03, 132.67, 134.3 (Ctert.-acac, Ctert.-aryl), 186.19, 193.96 (Ctert.-bridge). - *IR*: (cm-1): 1557, 1528 (CC, CN); 851 (oop-Mes)

**Complex 6**: Tetramesityl-oxalic amidine ( 2 mmol, 1.12 g) suspended in 50 mL THF was treated dropwise with a solution of diethylzink ( 1.1 m solution in THF, 0.91 mL) and refluxed. After the development of ethane was finished the yellow solution was treated with Ni(acac)2 (2 mmol, 0.51 g in 5 ml THF). The colour of the solution turned to red and after some hours a red microcrystalline product was isolated and recrystallised from THF. Yield: 35 %. - C86H102N8O4Ni2Zn: calcd.: C: 69.11, H: 6.88, N: 7.5, Ni: 7.85, Zn: 4,38%; found: C: 66.17, H: 6.78, N: 6.42, Ni: 7.29, Zn: 4.47%. - *1H-NMR (D8-THF, 25°C):* : 1.05, 1.13 (CH3-acac, 2x s, 12H), 1.69 (o-CH3-mes, s, 12H), 1.93, 1.95 (p-CH3-mes, 2x s, 12H), 2.14 (p-CH3-mes, s, 12H), 2.5, 2.53 (o-CH3-mes, 2x s, 36H). - *13C-NMR* (D8-THF, 25°C, ppm): : 19.66, 20.54 (o-CH3-mes), 20.61, 21 (p-CH3-mes), 24.92 (CH3-acac), 100.31, 100.74, 100.89 (CH-acac), 127.72, 127.91, 128.44 (CH-mes), 131.88, 132.33, 132.89, 133.12, 134.55, 134.63, 140.64, 141.28, 143.12 (Ctert.-mes), 162.63, 166.4 (Ctert.-bridge), 186.81, 194.65 (CO-acac).

**Complex 7**: Bis(mesityl)-bis(p-tolyl)oxalic amidine ( 3 mmol, 1.51 g) was dissolved in 18 ml THF ( = solution 1). 6 ml of this solution diluted with 20 mL THF was treated with diethylzink (1.1 M solution in toluene, 1.8 mL). This mixture was heated at reflux for five minutes, cooled a nd stiired at room temperature for 20 minutes. Then solution 1 ( 12 mL, 2 mmol of the ligand) was added at the reaction mixture again heated for five minutes. After cooling Ni(acac)2 (2 mmol, 0.51 g in 5 mL THF) was droped to the solution. The colour turned to red within some minutes. After stirring overnight 50% of the solvent was evaporated. The brown microcrystalline precipitate was recrystallised from THF or toluene yielding red –brown crystals. Single crystals suitable for X-ray crystallography were grown after slow cooling of the solution, Yield: 35 % . - C112H122N12O4Ni2Zn2 : calcd.: C: 69.04, H: 6.31, N: 8.63, Ni: 6.02, Zn: 6.71%; found: C: 68.21, H: 6.46, N: 8.23, Ni: 6.07, Zn: 6.17%. - *MS* (ESI + KClO4) isotop pattern, calculated: 1994.7 (10%), 1993.7 (13%), 1992.7 (21%), 1991.7 (39%), 1990.7 (51%), 1989.7 (71%), 1988.7 (84%), 1987.7 (basis), found: 1995.5 (10%), 1994.5 (14%), 1993.5 (23%), 1992.5 (33%), 1991.5 (42%), 1990.5 (60%), 1989.5 (71%), 1988.5 (76%), 1987.5 (basis), 1986.5 (98%), 1984.5 (66%), 1983.5 (65%), 1982.5 (25%), 1981.5 (20%). - PENDANT *13C NMR* (D8-THF, 25°C, 50.3 MHz)  (ppm): 19.28, 19.37, 19.56, 20.61, 20.73 (CH3, aryl), 24.08, 24.4, 24.8 (CH3, acac), 100.66 (CH, acac), 123.13, 123.45, 123.84, 127.62, 127.78, 127.95, 128.72, (CH, aryl), 130.87, 131.73, 131.91, 132.32, 133.24, 133.75, 134.04, (Ctert., aryl), 140.49, 142.72, 143.55, 143.75 (Ctert., acac) 155.81, 158.69, 186.69, 186.46 (NC-CN).

**Polyethylene:** The resulting polyethylene contains almost 140 methyl branches/1000 C, according to NMR spectra.
